# Supplementary material for: Voltage-gated proton channels from fungi highlight role of peripheral regions in channel activation
Source: PubMed Central journal article supplement (PMC7910559; doi:10.1038/s42003-021-01792-0), 2021-02-26
Supplement: 42003_2021_1792_MOESM3_ESM.pdf [file 42003_2021_1792_MOESM3_ESM.pdf]

## **Description of Additional Supplementary Files**

**File name:** Supplementary Data 1

**Description:** Dataset used to generate figures in the main text and supplementary figures.
